# Supplementary material for: Oscillatory ERK Signaling and Morphology Determine Heterogeneity of Breast Cancer Cell Chemotaxis via MEK-ERK and p38-MAPK Signaling Pathways
Source: MDPI journal article supplement (doi:10.3390/bioengineering10020269), 2023-02-18
Supplement: s1 [file s1]

Figure S1

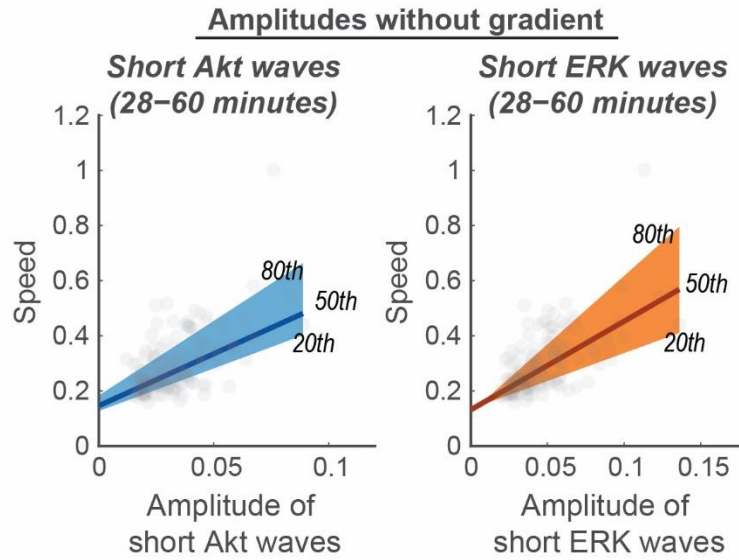

Figure S1: Linear relationship of speed with amplitudes of short signaling waves in conditions without a CXCL12 gradient ( $n_c = 158$ ). The x-axes of the two plots illustrate the amplitudes of short Akt waves (left) and short ERK waves (right). Their y-axes are all migration speed. The 20th, 50th, and 80th quantile regression results were overlaid to illustrate the relationship between signaling amplitude and speed without CXCL12 gradient.

Figure S2

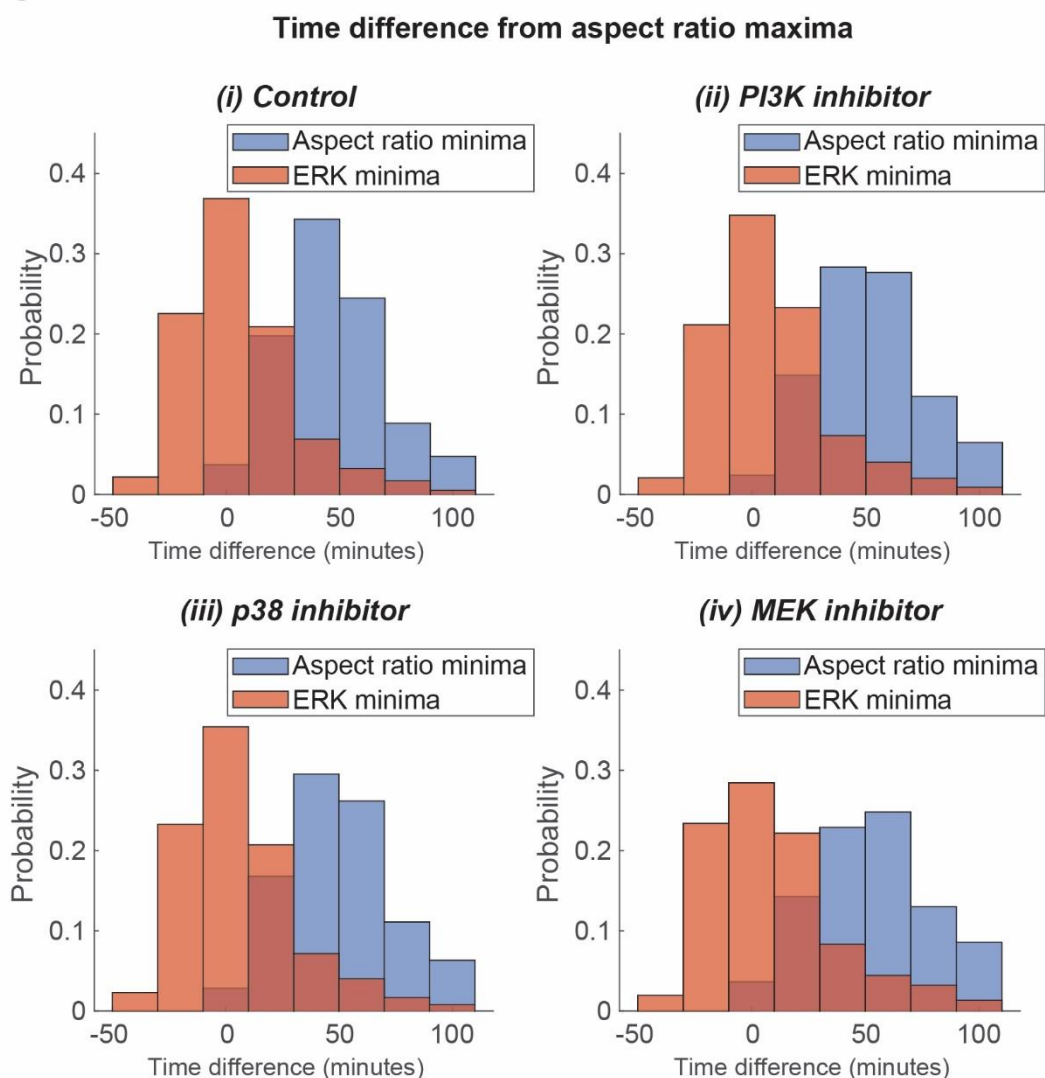

Figure S2: Distributions of aspect ratios and ERK time differences. With the aspect ratio peak aligned, the time differences from this peak to the local minima of aspect ratio and ERK signaling were measured. The overall ERK signal was detrended to eliminate the overall ERK trend and focus on the oscillation patterns. The distributions of the time differences for aspect ratio and ERK minima were illustrated with a histogram in different conditions: (i) Control (no compound), (ii) PI3K inhibitor (100 nM alpelisib), (iii) p38 inhibitor (10  $\mu$ M SB203580), and (iv) MEK inhibitor (10 nM trametinib).

Table S1

99% confidence intervals for quantile regression of amplitudes vs speed  
with 100 ng/ml to 0 ng/ml CXCL12 gradient for Figure 1E

|                              | Quantile regression  | Equation                                                             | Slope                                               | y-intercept                                        |
|------------------------------|----------------------|----------------------------------------------------------------------|-----------------------------------------------------|----------------------------------------------------|
| Amplitude of short Akt waves | 80th<br>50th<br>20th | $y = 8.198x + 0.252$<br>$y = 6.257x + 0.151$<br>$y = 3.765x + 0.130$ | 6.224 to 10.173<br>5.182 to 7.332<br>3.235 to 4.295 | 0.180 to 0.325<br>0.112 to 0.190<br>0.111 to 0.149 |
| Amplitude of short ERK waves | 80th<br>50th<br>20th | $y = 7.500x + 0.126$<br>$y = 5.135x + 0.109$<br>$y = 2.948x + 0.124$ | 6.712 to 8.289<br>4.617 to 5.653<br>2.605 to 3.291  | 0.083 to 0.170<br>0.080 to 0.137<br>0.105 to 0.142 |
| Amplitude of long Akt waves  | 80th<br>50th<br>20th | $y = 2.207x + 0.450$<br>$y = 2.214x + 0.275$<br>$y = 1.768x + 0.182$ | 0.924 to 3.489<br>1.468 to 2.959<br>1.463 to 2.072  | 0.392 to 0.508<br>0.246 to 0.304<br>0.169 to 0.194 |
| Amplitude of long ERK waves  | 80th<br>50th<br>20th | $y = 2.178x + 0.406$<br>$y = 2.403x + 0.232$<br>$y = 1.553x + 0.174$ | 1.368 to 2.987<br>1.945 to 2.861<br>1.286 to 1.821  | 0.358 to 0.454<br>0.203 to 0.261<br>0.160 to 0.188 |
| Amplitude of aspect ratio    | 80th<br>50th<br>20th | $y = 0.198x + 0.390$<br>$y = 0.175x + 0.227$<br>$y = 0.120x + 0.169$ | 0.118 to 0.278<br>0.131 to 0.219<br>0.100 to 0.140  | 0.320 to 0.461<br>0.193 to 0.261<br>0.153 to 0.186 |

Table S1: Quantile regression of amplitudes vs speed with 100 ng/mL to 0 ng/mL CXCL12 gradient for Figure 1E. Regression equation, 99% confidence intervals for slope and y-intercept are listed in the table for different amplitudes: short Akt waves, short ERK waves, long Akt waves, long ERK waves, and aspect ratio.

Table S2

99% confidence intervals for quantile regression of amplitudes vs speed  
**without CXCL12 gradient** for Figure 2E and S1

|                              | Quantile regression  | Equation                                                             | Slope                                                | y-intercept                                        |
|------------------------------|----------------------|----------------------------------------------------------------------|------------------------------------------------------|----------------------------------------------------|
| Amplitude of short Akt waves | 80th<br>50th<br>20th | $y = 5.418x + 0.183$<br>$y = 3.775x + 0.146$<br>$y = 3.098x + 0.127$ | 2.901 to 7.935<br>2.704 to 4.846<br>2.192 to 4.005   | 0.083 to 0.283<br>0.108 to 0.184<br>0.096 to 0.159 |
| Amplitude of short ERK waves | 80th<br>50th<br>20th | $y = 4.963x + 0.120$<br>$y = 3.214x + 0.131$<br>$y = 2.030x + 0.135$ | 3.744 to 6.181<br>2.356 to 4.072<br>1.565 to 2.495   | 0.060 to 0.181<br>0.090 to 0.173<br>0.113 to 0.156 |
| Amplitude of long Akt waves  | 80th<br>50th<br>20th | $y = 0.747x + 0.340$<br>$y = 1.213x + 0.232$<br>$y = 0.410x + 0.200$ | -1.435 to 2.930<br>0.146 to 2.279<br>-0.350 to 1.170 | 0.256 to 0.425<br>0.198 to 0.267<br>0.173 to 0.228 |
| Amplitude of long ERK waves  | 80th<br>50th<br>20th | $y = 0.568x + 0.331$<br>$y = 1.201x + 0.223$<br>$y = 0.526x + 0.191$ | -1.280 to 2.416<br>0.439 to 1.962<br>-0.008 to 1.060 | 0.238 to 0.425<br>0.188 to 0.258<br>0.167 to 0.215 |
| Amplitude of aspect ratio    | 80th<br>50th<br>20th | $y = 0.112x + 0.292$<br>$y = 0.135x + 0.208$<br>$y = 0.110x + 0.166$ | -0.028 to 0.252<br>0.069 to 0.200<br>0.069 to 0.151  | 0.216 to 0.368<br>0.168 to 0.248<br>0.142 to 0.190 |

Table S2: Quantile regression of amplitudes vs speed without CXCL12 gradient for Figure 2E and S1. Regression equation, 99% confidence intervals for slope and y-intercept are listed in the table for different amplitudes: short Akt waves, short ERK waves, long Akt waves, long ERK waves, and aspect ratio.

Table S3

99% confidence intervals for quantile regression of amplitudes vs speed  
**with 15 ng/ml to 0 ng/ml EGF gradient for Figure 3D**

|                              | Quantile regression | Equation             | Slope          | y-intercept    |
|------------------------------|---------------------|----------------------|----------------|----------------|
| Amplitude of short Akt waves | 80th                | $y = 5.808x + 0.415$ | 4.549 to 7.066 | 0.356 to 0.474 |
|                              | 50th                | $y = 5.785x + 0.272$ | 4.834 to 6.736 | 0.228 to 0.317 |
|                              | 20th                | $y = 4.568x + 0.189$ | 3.464 to 5.671 | 0.136 to 0.242 |
| Amplitude of short ERK waves | 80th                | $y = 5.193x + 0.325$ | 4.296 to 6.089 | 0.260 to 0.390 |
|                              | 50th                | $y = 5.004x + 0.197$ | 4.342 to 5.667 | 0.150 to 0.243 |
|                              | 20th                | $y = 3.372x + 0.174$ | 2.633 to 4.111 | 0.121 to 0.226 |

Table S3: Quantile regression of amplitudes vs speed with 15 ng/mL to 0 ng/mL EGF gradient for Figure 3D. Regression equation, 99% confidence intervals for slope and y-intercept are listed in the table for different amplitudes: short Akt waves and short ERK waves.

Table S4

99% confidence intervals for quantile regression of ERK difference, aspect ratio difference, nuclear polarization, and average cell speed for Figure 4C,D,F

|                                                 | Quantile regression  | Equation                                                                | Slope                                                    | y-intercept                                        |
|-------------------------------------------------|----------------------|-------------------------------------------------------------------------|----------------------------------------------------------|----------------------------------------------------|
| ERK difference vs aspect ratio difference       | 80th<br>50th<br>20th | $y = -1.797x + 1.070$<br>$y = -1.389x + 0.431$<br>$y = -1.000x + 0.096$ | -2.107 to -1.488<br>-1.561 to -1.217<br>-1.079 to -0.921 | 1.019 to 1.120<br>0.404 to 0.458<br>0.082 to 0.111 |
| ERK difference vs nuclear polarization          | 80th<br>50th<br>20th | $y = -0.223x + 0.307$<br>$y = -0.122x + 0.206$<br>$y = -0.085x + 0.144$ | -0.270 to -0.177<br>-0.148 to -0.096<br>-0.106 to -0.063 | 0.299 to 0.315<br>0.202 to 0.210<br>0.140 to 0.148 |
| Aspect ratio difference vs nuclear polarization | 80th<br>50th<br>20th | $y = 0.137x + 0.223$<br>$y = 0.079x + 0.171$<br>$y = 0.039x + 0.127$    | 0.130 to 0.144<br>0.073 to 0.084<br>0.035 to 0.044       | 0.216 to 0.230<br>0.166 to 0.177<br>0.123 to 0.132 |
| Average cell speed vs nuclear polarization      | 80th<br>50th<br>20th | $y = 0.192x + 0.231$<br>$y = 0.094x + 0.170$<br>$y = 0.057x + 0.123$    | 0.145 to 0.238<br>0.074 to 0.114<br>0.039 to 0.074       | 0.206 to 0.256<br>0.160 to 0.180<br>0.115 to 0.132 |

Table S4: Quantile regression of ERK difference, aspect ratio difference, nuclear polarization, and average cell speed for figure 4C,D,F. Regression equation, 99% confidence intervals for slope and y-intercept are listed in the table.

Table S5

VSI results for different drug conditions

| Sample Name | $D \text{ (L}^2/\text{T)}$ | $v_x \text{ (L/T)}$ | $v_y \text{ (L/T)}$ |
|-------------|----------------------------|---------------------|---------------------|
| Control1    | 29.600                     | -0.193              | 0.050               |
| Control2    | 29.700                     | -0.153              | 0.095               |
| PI3Ki       | 32.500                     | -0.165              | 0.015               |
| p38i        | 25.200                     | -0.077              | -0.049              |
| MEKi        | 23.300                     | -0.015              | 0.037               |

Table S5: Variational system inference results for different drug conditions.  $D$ ,  $v_x$ , and  $v_y$  are the diffusivity and the advective velocities in  $x$  and  $y$  directions respectively.
